# Supplementary material
Source: publisher site journal article supplement (https://www.spandidos-publications.com/8634/downloadSupplementary)
Supplement: Supplementary file 1 [file downloadSupplementary]

## Sheet: Sheet1
Table SIII. Common targets of DCM and baicalin.
DCM	Baicalin
INS	AKR1B1
TTN	ADORA1
LMNA	TNF
KCNJ11	IL2
MYH7	XDH
ACE	PTGS2
GCK	RPS6KA3
PPARG	EGFR
DSP	ACHE
ABCC8	NQO2
TNNT2	NMUR2
IL6	ADRA2A
INSR	ADRA2C
VEGFA	NOX4
MYBPC3	ALDH2
TNNI3	CA2
WFS1	CA12
HNF1A	FDFT1
MYH6	MAPK14
LEP	IMPDH2
IGF1	NEU2
TCF7L2	POLA1
TTN-AS1	CA13
RYR2	ASNS
HFE	HPRT1
DMD	CD38
TPM1	P2RY1
SOD2	FPGS
NOS3	MGAM
CCL2	ALOX5
MT-TL1	GAA
ADIPOQ	FGF2
CTLA4	CA1
HLA-DQB1	CA9
DSC2	HK2
TNF	HK1
HLA-DRB1	POLD1
SCN5A	EGLN1
KCNQ1	POLB
PON1	POLG
PRKAG2	KDM5A
CAT	TYMS
RETN	P2RY4
TTR	P2RY2
ALB	P2RY6
SLC2A2	KCNA3
ALMS1	CASP3
TGFB1	ITPR1
ACTN2	NEU4
FLNC	MAG
APOE	FOLR1
MT-ND1	GART
APOA1	SELP
NPPA	MMP16
SLC2A4	MMP1
ADRB3	MMP14
ENPP1	MMP8
STAT3	FOLH1
BSCL2	EIF4E
DSG2	NPC1L1
PRDM16	AMY2A
TNNC1	KDM4D
TGFB3	KDM4C
AVP	ABCB1
AKT1	CASP6
ACTC1	CASP7
CRP	CASP8
ADRB2	CASP1
TAZ	CASP2
AGPAT2	DNMT1
HRAS	F10
IGF2	DNMT3B
TP53	ANPEP
EMD	ERAP2
GATA6	DHFR
CPT2	PTPN22
PNPLA2	YARS
MT-TK	SQLE
SLC19A2	ADCY10
CRYAB	CA7
LAMP2	CA4
GNAS	CAPN1
MIR146A	ITGAV ITGB3
HLA-DQA1	NEU3
FN1	PIK3CA
IL1RN	ATIC
SLC25A4	CMA1
FXN	IDO1
PTPN22	SIGMAR1
FOXP3	DRD2
MYL2	ENPEP
DES	LAP3
CP	P2RY11
EPO	NAALAD2
AGT	ERAP1
RAF1	ITGB1 ITGA4
FOS	ADORA2B
PLIN1	HDAC3
JUP	HDAC6
IGF2BP2	HDAC2
SDHA
GLA
CAV3
GHRL
POMC
EDN1
GHR
NPPB
AKT2
IFIH1
APOB
EIF2AK3
HAMP
BRAF
AGTR1
HLA-B
ZFP57
PSEN1
SERPINE1
ICAM1
MIR21
IL1B
PTPN11
CPT1A
ELN
MT-ATP6
CSRP3
MAP2K1
STAT1
ACADVL
SGCD
VCL
IAPP
FTO
AVPR2
MT-CO1
PLAGL1
IL10
